# Supplementary material for: Aberrant methylation-mediated decrease of lncRNA HNF1A-AS1 contributes to malignant progression of laryngeal squamous cell carcinoma via EMT
Source: PubMed Central journal article supplement — Oncol Rep. 2020 Oct 23;44(6):2503–16. doi: 10.3892/or.2020.7823 (PMC7640355; doi:10.3892/or.2020.7823), 2020-10-23
Supplement: Supplementary_Data.pdf [file Supplementary_Data.pdf]

Figure S1. Body weights of mice. (A) Body weight of mice in the xenograft model using subcutaneous injections. (B) Body weight of mice in the xenograft model using submucosal injection in the tongue. HNF1A-AS1, hepatic nuclear factor 1  $\alpha$  antisense RNA 1; NC, negative control; shRNA, short hairpin RNA.

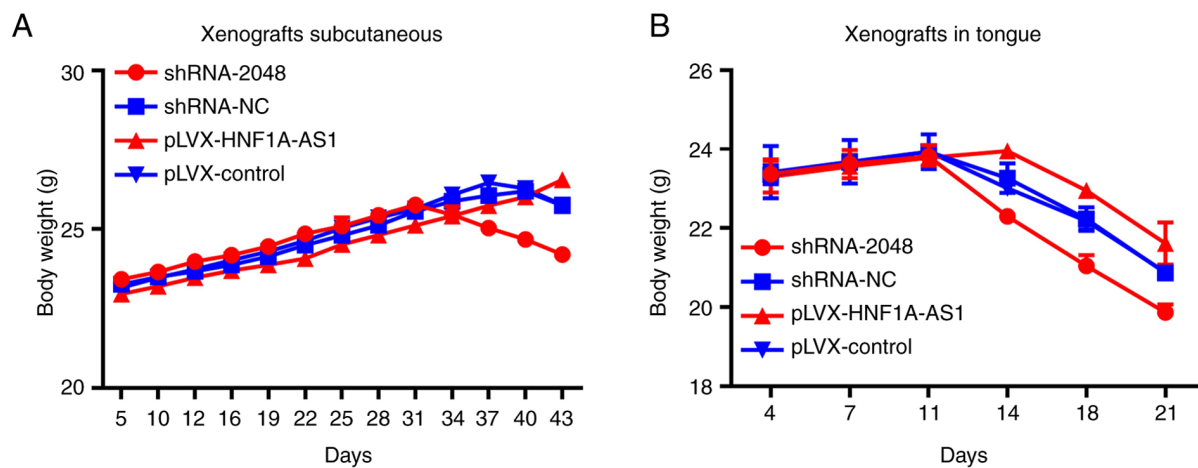

Figure S2. Downregulation and overexpression of HNF1A-AS1 in human laryngeal squamous cell carcinoma cell lines. (A) Reverse transcription-quantitative PCR analysis of HNF1A-AS1 expression in tumor cell lines (AMC-HN-8, TU-686 and TU-177). (B) Expression levels of HNF1A-AS1 in TU-686 cells were significantly decreased following transfection with shRNA-1525 and shRNA-2048 compared with those in the blank and shRNA-NC groups. (C) Expression levels of HNF1A-AS1 in TU-177 cells were significantly increased following transfection with pLVX-HNF1A-AS1 compared with those in the blank and pLVX-control groups. For statistical analysis, one-way ANOVA with Tukey's post hoc test was used. \*\* $P < 0.01$ , \*\*\* $P < 0.001$ , \*\*\*\* $P < 0.0001$ . Each experiment was performed in triplicate. HNF1A-AS1, hepatic nuclear factor 1  $\alpha$  antisense RNA 1; NC, negative control; shRNA, short hairpin RNA.

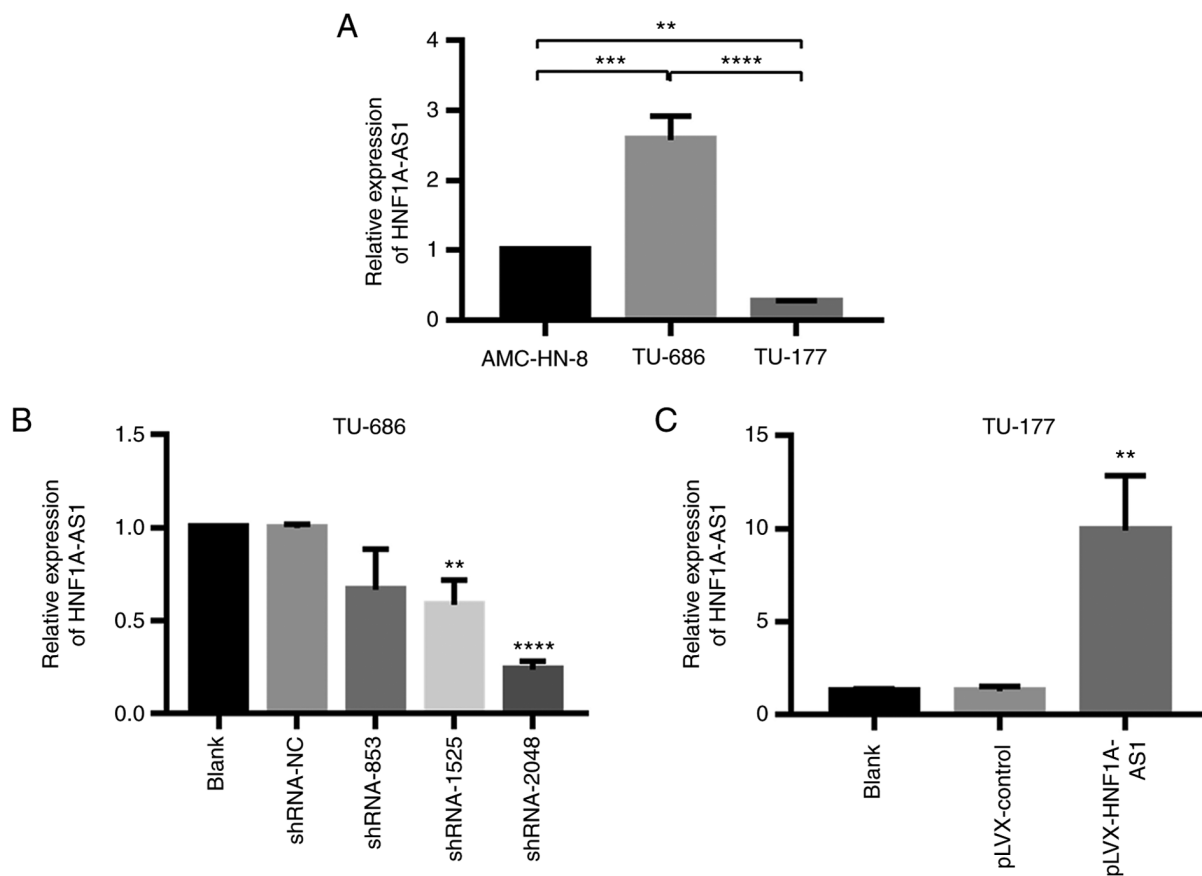

Table SI. List of primers and probes used.

| Target                                  | Primer and probe sequences (5'-3')                                     |
|-----------------------------------------|------------------------------------------------------------------------|
| Full-length cDNA of HNF1A-AS1           |                                                                        |
| Forward                                 | CCGGAATTCAGTAAGTGCAGTAGGTAGGC                                          |
| Reverse                                 | ATAAGAATGCGGCCGCGAGACGGAGTTTCGTTCTTG                                   |
| HNF1A-AS1 short hairpin RNA             |                                                                        |
| 1525A                                   | GATCCGATCACTGTTACGTGATTATTCAAGAGATAATCACGTAACAG<br>TGATCTTTTTTCTCGAGG  |
| 1525B                                   | AATTCCTCGAGAAAAAAGATCACTGTTACGTGATTATCTCTTGAATA<br>ATCACGTAACAGTGATCG  |
| 2048A                                   | GATCCGGTATCACCTGCATATTATTTCAAGAGAATAATATGCAGGTGA<br>TACCTTTTTTCTCGAGG  |
| 2048B                                   | AATTCCTCGAGAAAAAAGGTATCACCTGCATATTATCTCTTGAAT<br>ATGCAGGTGATACCG       |
| 853A                                    | GATCCGCCAGAATCTAAGCCTTGATTCAAGAGATCAAGGCTTAGATT<br>CTGGCTTTTTTCTCGAGG  |
| 853B                                    | AATTCCTCGAGAAAAAAGCCAGAATCTAAGCCTTGATCTCTTGAAT<br>CAAGGCTTAGATTCTGGCG  |
| NCA                                     | GATCCTTCTCCGAACGTGTCACGTTTCAAGAGAACGTGACACGTTC<br>GGAGAATTTTTTCTCGAGG  |
| NCB                                     | AATTCCTCGAGAAAAAATTCTCCGAACGTGTCACGTTCTCTTGAAA<br>CGTGACA CGTTCGGAGAAG |
| HNF1A-AS1 ( <i>Homo sapiens</i> )       |                                                                        |
| Forward                                 | AGAATCGCTTGAACCCAGGA                                                   |
| Reverse                                 | AGAAGTGGGGTCGTCATGTT                                                   |
| MSP: Methylated HNF1A-AS1 CpG islands   |                                                                        |
| Forward                                 | GGTTGAGGTAGGAGAATGGCGTGAA                                              |
| Reverse                                 | TCCCTAATCAACTCAAACCCCAACG                                              |
| MSP: Unmethylated HNF1A-AS1 CpG islands |                                                                        |
| Forward                                 | AGGTTGAGGTAGGAGAATGGCGTGA                                              |
| Reverse                                 | CCCTAATCAACTCAAACCCCAACGT                                              |
| BSP primer                              |                                                                        |
| Forward                                 | GTGAATTTAGGAGGTAGAGTTTGTAG                                             |
| Reverse                                 | GGAAAGATAGGGATTAGTTGAGT                                                |

BSP, bisulfite genomic sequencing; HNF1A-AS1, hepatic nuclear factor 1  $\alpha$  antisense RNA 1; MSP, methylation-specific polymerase chain reaction; NC, non-specific control.
